# Supplementary material for: Surface-Modified Activated Carbon Fibers by a Facile Microwave Technique for Enhancing Hydrocarbon Adsorption
Source: MDPI journal article supplement (doi:10.3390/environments10030052), 2023-03-13
Supplement: s1 [file s1]

Archive with 1 entries (1 files):
- environments-2266087-supplementary.pdf
