# Supplementary material for: Surface-Modified Activated Carbon Fibers by a Facile Microwave Technique for Enhancing Hydrocarbon Adsorption
Source: MDPI journal article supplement (doi:10.3390/environments10030052), 2023-03-13
Supplement: s1 [file s1 › environments-2266087-supplementary.pdf]

**Surface-Modified Activated Carbon Fibers by a Facile  
Microwave Technique for Enhancing Hydrocarbon Adsorption**

Jin-Young Lee and Byung-Joo Kim \*

*Department of Advanced Materials and Chemical Engineering, Jeonju University, Jeonju 55069,  
Republic of Korea*

*Keywords: activated carbon fiber, oxygen functional group, microwave heating, evaporative gas*

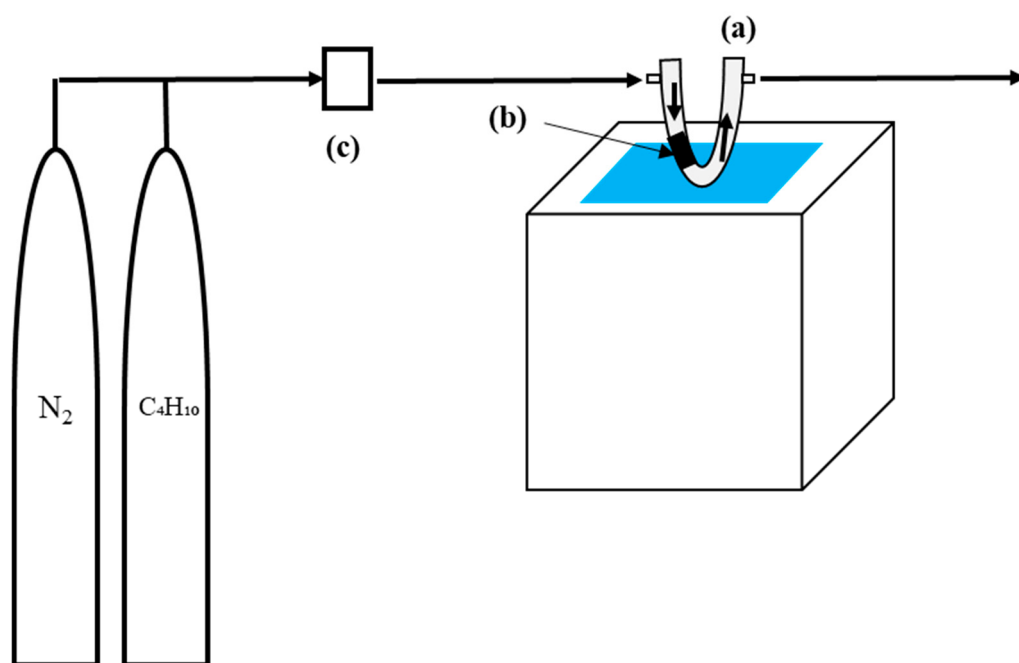

**Figure S1.** Schematic diagram of modified ASTM D5228; (a) U-shaped cell, (b) activated carbon fiber and (c) flow controller.
